# Supplementary material
Source: PubMed Central journal article supplement (PMC4320660)
Supplement: NIHMS646517-supplement-3.pdf [file NIHMS646517-supplement-3.pdf]

### Supplement Figure 3

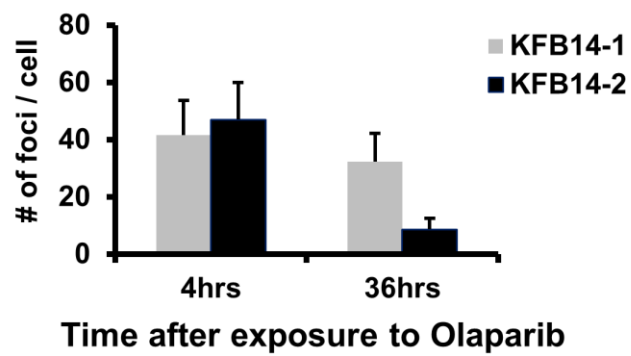

**Supplementary Figure 3.** BRCA1 mutations in proband cells result in compromised DNA damage repair. Fibroblast cultures were treated with 5  $\mu$ M Olaparib for 4 hrs. Immunofluorescence was utilized to monitor  $\gamma$ H<sub>2</sub>AX foci as an indicator of unrepaired DSBs.
